# Supplementary material for: Alloyed (ZnS)x(Cu2SnS3)1−xand (CuInS2)x(Cu2SnS3)1−xnanocrystals with arbitrary composition and broad tunable band gaps
Source: Royal Society of Chemistry journal article supplement (doi:10.1039/c0cc03560b), 2010-11-15
Supplement: c0cc03560b.pdf [file c0cc03560b.pdf]

## Supporting Information Available

# Alloyed $(\text{ZnS})_x(\text{Cu}_2\text{SnS}_3)_{1-x}$ and $(\text{CuInS}_2)_x(\text{Cu}_2\text{SnS}_3)_{1-x}$ Nanocrystals with Arbitrary Composition and **Broad** Tunable Band Gaps

Qinghui Liu,<sup>†,‡</sup> Zechen Zhao,<sup>†</sup> Yuhan Lin,<sup>†</sup> Peng Guo,<sup>†</sup> Shenjie Li,<sup>†</sup> Daocheng Pan,<sup>†\*</sup> Xiangling Ji<sup>†\*</sup>

<sup>†</sup>State Key Laboratory of Rare Earth Resource Utilization, <sup>‡</sup>State Key Laboratory of Polymer Physics and Chemistry, Changchun Institute of Applied Chemistry, Chinese Academy of Sciences, Graduate School of the Chinese Academy of Sciences, 5625 Renmin Street, Changchun 130022, China

## Experimental Section

### I. Chemicals

CuCl,  $\text{CuCl}_2 \cdot 2\text{H}_2\text{O}$ ,  $\text{ZnCl}_2$ ,  $\text{InCl}_3 \cdot 4\text{H}_2\text{O}$ , sulfur powder (99.999%), carbon disulfide ( $\text{CS}_2$ , 99.9%), *n*-dibutylamine (99%), oleylamine (OM, 80~90%), *n*-Dodecanethiol (DDT, 98%), 1-octadecene (ODE, 90%), and tetrachloromethane (HPLC) were purchased from Aladdin Inc. Oleic acid (OA, 90%) and tri-*n*-octylphosphine oxide (TOPO, 90%) were obtained from Sigma-Aldrich.  $\text{SnCl}_2$  was purchased from Alfa Aesar. All chemicals were used as received.

### II. Preparation of two types of sulfur precursors

a) 1.0 M S/OM solution was prepared by dissolving 0.64 g (20.0 mmol) of sulfur powder in 20.0 mL of oleylamine at 120 °C.

b) 1.0 M dibutyldithiocarbamic acid/ODE (DBDCA/ODE) solution was prepared by dropping 1.52 g (20.0 mmol) of  $\text{CS}_2$  and 2.6 g (20.0 mmol) of dibutylamine in 10.0 mL of ODE at room temperature. Subsequently, the solution was diluted to 20.0 mL

with ODE. DBDCA ( $\text{HS}_2\text{CNBu}_2$ ) was synthesized by the reaction of dibutylamine and  $\text{CS}_2$  according to the literature.<sup>1</sup>

### **III. Synthesis of zincblende $\text{Cu}_2\text{SnS}_3$ and alloyed $(\text{ZnS})_x(\text{Cu}_2\text{SnS}_3)_{1-x}$ and $(\text{CuInS}_2)_x(\text{Cu}_2\text{SnS}_3)_{1-x}$ nanocrystals**

In a typical synthesis, 20.0 mg (0.2 mmol) of  $\text{CuCl}$ , 19.0 mg (0.1 mmol) of  $\text{SnCl}_2$ , and 10.0 mL of oleylamine were added to a 50 mL three-neck flask and the reaction mixture was heated to 130 °C. The inside of the flask was degassed by a vacuum pump for 10 min and argon gas was charged from the balloon. This procedure was repeated three times to remove the oxygen and water. Then, the temperature was increased to 240 °C, and 1.0 mL of S/OM solution was swiftly injected into the flask under magnetic stirring. After 60 min, the crude solution was cooled to 60 °C and then precipitated with 30 mL of ethanol and further isolated by centrifugation and decantation. The purified nanocrystals were re-dispersed in toluene for TEM and XRD measurements without any size sorting. The same procedure as above was applied to synthesize alloyed  $(\text{ZnS})_x(\text{Cu}_2\text{SnS}_3)_{1-x}$  and  $(\text{CuInS}_2)_x(\text{Cu}_2\text{SnS}_3)_{1-x}$  nanocrystals by changing stoichiometric ratios between  $\text{CuCl}$ ,  $\text{SnCl}_2$ ,  $\text{ZnCl}_2$ , and  $\text{InCl}_3$  precursors. Detailed synthetic conditions were listed in Table S1.

### **IV. Synthesis of wurtzite $\text{Cu}_2\text{SnS}_3$ nanocrystals**

Wurtzite  $\text{Cu}_2\text{SnS}_3$  nanocrystals were synthesized by using more reactive sulfur precursor (DBDCA) and stronger capping agents (OA, DDT and TOPO). The effects of the sulfur precursors and the capping agents on the  $\text{Cu}_2\text{SnS}_3$  structures will be

published elsewhere. 34.0 mg (0.2 mmol) of  $\text{CuCl}_2 \cdot 2\text{H}_2\text{O}$ , 19.0 mg (0.1 mmol) of  $\text{SnCl}_2$ , 0.2 mL of oleylamine, 2.0 mL of OA, 0.5 g of TOPO, and 5.0 mL ODE were placed in a 50 mL three-neck flask and the reaction mixture was heated to 210 °C under argon atmosphere. Next, 1.0 mL of DDT was injected into the flask by a syringe. When the temperature was returned to 210 °C, 1.0 mL of DBDCA/ODE solution was swiftly injected into the flask under magnetic stirring, and the reaction temperature was maintained at 210 °C for 20 min.

## V. Characterization

The powder XRD patterns were recorded using a Bruker D8 FOCUS X-ray diffractometer. The simulated  $\text{Cu}_2\text{SnS}_3$  powder XRD patterns were obtained by using Diamond 3.0 and CCDC Mercury 1.4.2 programs. The lattice mismatch was calculated via the following function:  $\delta = 2|(a_2 - a_1)/(a_2 + a_1)| * 100\%$ , where  $a$  is  $a$ -axis lattice constant. UV-Vis-NIR absorption spectra were measured by Shimadzu UV-3600. Low resolution TEM (LR-TEM) images and selected area electron diffraction (SAED) were taken on a JEOL-1011 electron microscope with an accelerating voltage of 100 kV. High resolution TEM (HR-TEM) images were taken on a FEI Tecnai G2 F20 with an accelerating voltage of 200 kV. Energy Disperse Spectroscopy (EDS) spectra were obtained by using a scanning electron microscope (Hitachi S-4800) equipped with a Bruker AXS XFlash detector 4010. X-ray photoelectron spectra (XPS) were measured with VG ESCALAB MK (VG Company, UK) at room temperature by using a Mg  $K\alpha$  X-ray source ( $h\nu = 1253.6$  eV) at 14 kV and 20 mA.

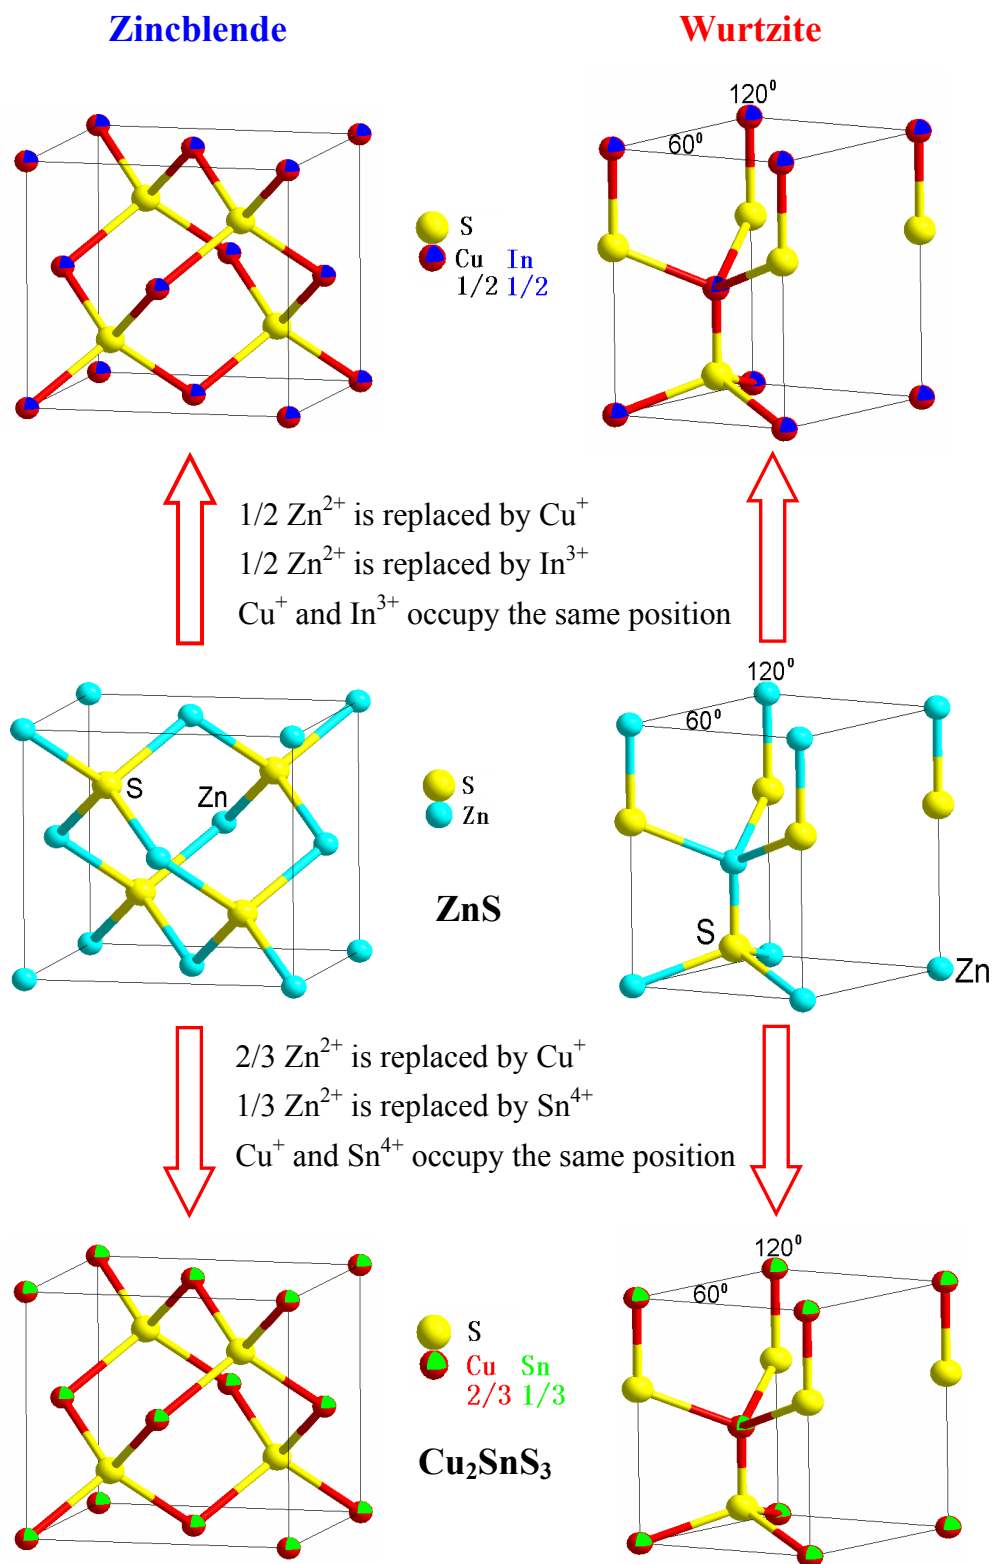

**Figure S1.** The unit cells and structure relations of ZnS, CuInS<sub>2</sub>, and Cu<sub>2</sub>SnS<sub>3</sub> with zincblende (left) and wurtzite (right) structures.

### **Crystal data**

|                      |                                    |                                                          |
|----------------------|------------------------------------|----------------------------------------------------------|
| Formula              | Cu <sub>2</sub> SnS <sub>3</sub>   |                                                          |
| Crystal system       | Zincblende                         | Wurtzite                                                 |
| Space group          | <i>F</i> -43 <i>m</i> (No. 216)    | <i>P</i> 63 <i>mc</i> (No. 186)                          |
| Unit cell dimensions | $a = b = c = 5.428(8) \text{ \AA}$ | $a = b = 3.815(1) \text{ \AA}, c = 6.265(7) \text{ \AA}$ |

### **Atomic coordinates**

| Atom | Wyck. | x/a | y/b | z/c | Atom | Wyck. | x/a | y/b | z/c    |
|------|-------|-----|-----|-----|------|-------|-----|-----|--------|
| S    | 4c    | 1/4 | 1/4 | 1/4 | S    | 2b    | 1/3 | 2/3 | 0      |
| Sn   | 4a    | 0   | 0   | 0   | Sn   | 2b    | 1/3 | 2/3 | 0.3752 |
| Cu   | 4a    | 0   | 0   | 0   | Cu   | 2b    | 1/3 | 2/3 | 0.3752 |

Notice that both Cu and Sn atoms occupy the same position, and the occupancy possibilities of Cu and Sn are 2/3 and 1/3, respectively.

**Table S1.** Synthetic conditions of zincblende Cu<sub>2</sub>SnS<sub>3</sub> as well as alloyed (ZnS)<sub>x</sub>(Cu<sub>2</sub>SnS<sub>3</sub>)<sub>1-x</sub> and (CuInS<sub>2</sub>)<sub>x</sub>(Cu<sub>2</sub>SnS<sub>3</sub>)<sub>1-x</sub> nanocrystals.

| Formula                                                                                 | Temp. (°C) | Time (min) | Ligand+Solvent |
|-----------------------------------------------------------------------------------------|------------|------------|----------------|
| ZnS                                                                                     | 280        | 60         | 10 mL OM       |
| (ZnS) <sub>x</sub> (Cu <sub>2</sub> SnS <sub>3</sub> ) <sub>1-x</sub>                   | 200-240    | 60         | 10 mL OM       |
| Cu <sub>2</sub> SnS <sub>3</sub>                                                        | 240        | 60         | 10 mL OM       |
| (CuInS <sub>2</sub> ) <sub>1/5</sub> (Cu <sub>2</sub> SnS <sub>3</sub> ) <sub>4/5</sub> | 200-240    | 60         | 10 mL OM       |
| CuInS <sub>2</sub>                                                                      | 200        | 30         | 10 mL OM       |

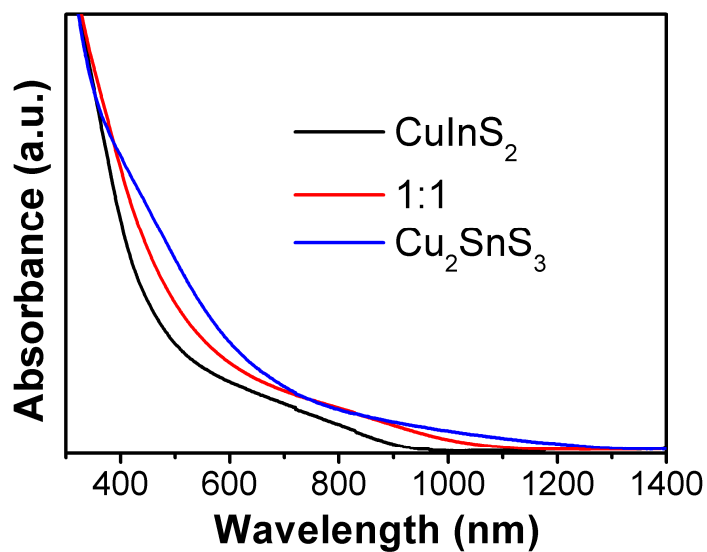

**Figure S2.** UV-Vis-NIR absorption spectra of  $\text{CuInS}_2$ ,  $(\text{CuInS}_2)_{1/2}(\text{Cu}_2\text{SnS}_3)_{1/2}$ , and  $\text{Cu}_2\text{SnS}_3$  nanocrystals in tetrachloromethane.

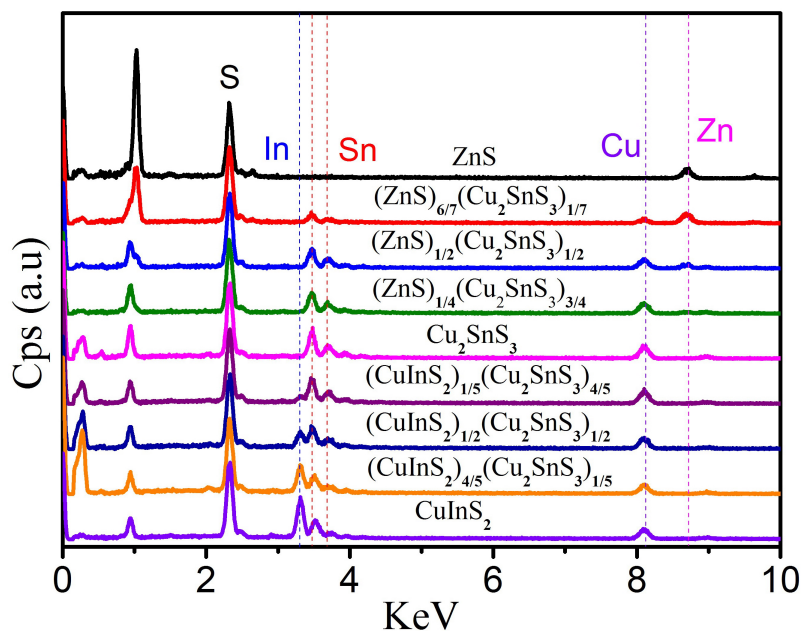

**Figure S3.** EDS spectra of alloyed  $(\text{ZnS})_x(\text{Cu}_2\text{SnS}_3)_{1-x}$  and  $(\text{CuInS}_2)_x(\text{Cu}_2\text{SnS}_3)_{1-x}$  nanocrystals with a zincblende structure.

**Table S2.** EDS results (atomic percent) of zincblende  $(\text{ZnS})_x(\text{Cu}_2\text{SnS}_3)_{1-x}$  and  $(\text{CuInS}_2)_x(\text{Cu}_2\text{SnS}_3)_{1-x}$  nanocrystals as well as wurtzite  $\text{Cu}_2\text{SnS}_3$  nanocrystals.

| Formula <sup>a</sup>                                                 | Zn%   | Cu%   | Sn%   | In%   | S%    |
|----------------------------------------------------------------------|-------|-------|-------|-------|-------|
| <sup>b</sup> ZnS                                                     | 49.86 | ----  | ----  | ----  | 50.14 |
| <sup>b</sup> $(\text{ZnS})_{6/7}(\text{Cu}_2\text{SnS}_3)_{1/7}$     | 29.69 | 12.92 | 5.38  | ----  | 52.01 |
| <sup>b</sup> $(\text{ZnS})_{1/2}(\text{Cu}_2\text{SnS}_3)_{1/2}$     | 10.62 | 24.98 | 11.48 | ----  | 52.93 |
| <sup>b</sup> $(\text{ZnS})_{1/4}(\text{Cu}_2\text{SnS}_3)_{3/4}$     | 5.09  | 31.86 | 15.12 | ----  | 47.94 |
| <sup>b</sup> $\text{Cu}_2\text{SnS}_3$                               | ----  | 32.90 | 16.90 | ----  | 50.20 |
| <sup>b</sup> $(\text{CuInS}_2)_{1/5}(\text{Cu}_2\text{SnS}_3)_{4/5}$ | ----  | 31.18 | 13.34 | 3.34  | 52.14 |
| <sup>b</sup> $(\text{CuInS}_2)_{1/2}(\text{Cu}_2\text{SnS}_3)_{1/2}$ | ----  | 31.09 | 9.68  | 9.04  | 50.19 |
| <sup>b</sup> $(\text{CuInS}_2)_{4/5}(\text{Cu}_2\text{SnS}_3)_{1/5}$ | ----  | 25.59 | 4.43  | 17.15 | 52.84 |
| <sup>b</sup> $\text{CuInS}_2$                                        | ----  | 23.62 | ----  | 24.31 | 52.07 |
| <sup>c</sup> $\text{Cu}_2\text{SnS}_3$                               | ----  | 34.68 | 15.20 | ----  | 50.12 |

<sup>a</sup> calculated by the ratio of co-precursors used

<sup>b</sup> Zincblende phase

<sup>c</sup> Wurtzite phase

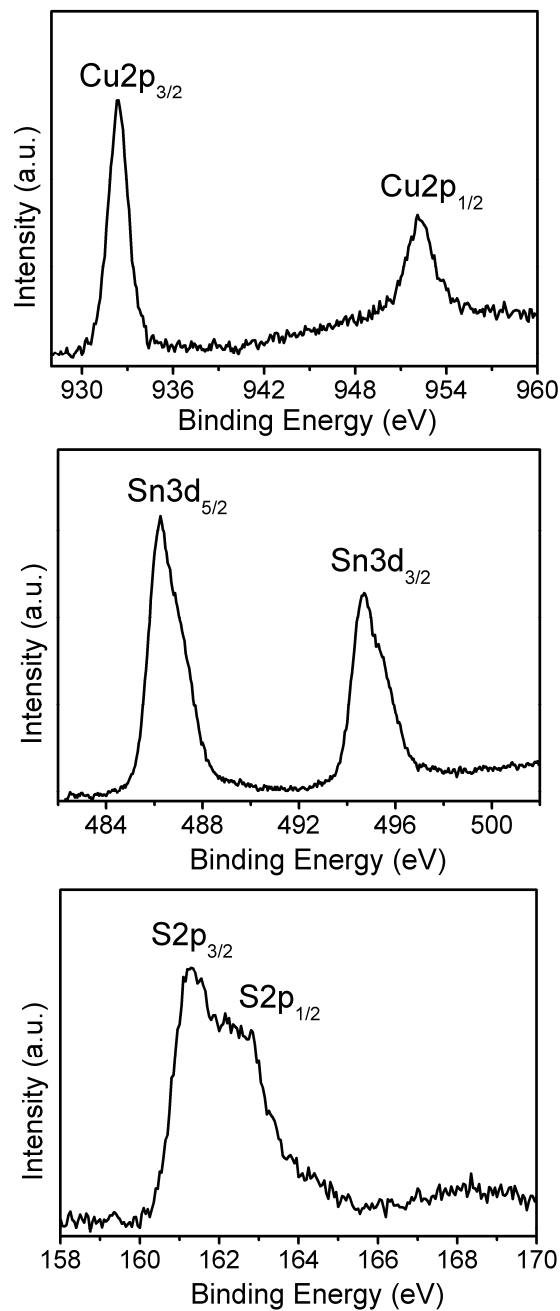

**Figure S4.** XPS spectra of oleylamine-capped  $\text{Cu}_2\text{SnS}_3$  nanocrystals. (Top)  $\text{Cu}2p$ ; (middle)  $\text{Sn}3d$ ; (bottom)  $\text{S}2p$ .

**Reference:**

1. R. Nomura, S. Inazawa, K. Kanaya, H. Matsuda, *Appl. Organomet. Chem.* **1989**, *3*, 195.
